**Clinical Circulation: Outcomes II**

**A-245** Room 310, 10/16/2000 3:30 PM - 5:00 PM (PD)  
**Hypotension and Hypertension Are Associated with Negative Postoperative Outcomes Independent of Preoperative Risk Factors** David L. Reich, M.D.; Elliott Bennett-Guerrero, M.D.; Carol A. Bodian, Dr.P.H.; Sabera Hossain, M.Sc.; Marina Krol, Ph.D., Department of Anesthesiology, Mount Sinai School of Medicine, New York, NY, United States

**A-246** Room 310, 10/16/2000 3:30 PM - 5:00 PM (PD)  
**Activities of Daily Living and Cardiovascular Complications Following Elective, Noncardiac Surgery** Richard A. Wiklund, MD; H. David Stein, MD; Stanley H. Rosenbaum, MD, Anesthesiology, Yale University School of Medicine, New Haven, CT, United States. Patient age and ASA-PS are highly predictive of adverse perioperative cardiac outcomes while activities of daily living are not.

**A-247** Room 310, 10/16/2000 3:30 PM - 5:00 PM (PD)  
**Thoracoabdominal Aortic Aneurysms: Consultant Physician Anesthesia Care Is Safer Than the Physician-CRNA Anesthesia Care Team** Patrick E. Curling, MD; Joseph S. Coselli, MD; John C. Frenzel, MD; Jose Pagan, MD; Scott A. LeMaire, MD, Greater Houston Anesthesiology, The Methodist Hospital, Houston, TX, United States

**A-248** Room 310, 10/16/2000 3:30 PM - 5:00 PM (PD)  
**A Simple Intraoperative Transfusion Algorithm Reduced Non-Red Blood Cell Component Use Following Cardiopulmonary Bypass** Gregory A. Nuttall, M.D.; William C. Oliver, M.D.; Paula J. Santrach, M.D.; Hartzell V. Schaff, M.D.; Mark H. Ereth, M.D., Anesthesiology, Mayo Clinic, Rochester, MN, United States. Use of a transfusion algorithm in bleeding cardiac surgery patients reduced transfusions and ICU bleeding.

**A-249** Room 310, 10/16/2000 3:30 PM - 5:00 PM (PD)  
**Clinicians' Response to Benchmarking: The Biomed Belgium National Survey about Transfusion for Orthopedics** Ph. L. Baele, MD; C. Beguin, MD; M. Lambermont, Pharm; E. Vandermeersch, MD, PhD; H. Waterloos, MD, The Biomed Transfusion Study Group, Belgium. A nation-wide quality cycle using anonymous benchmarking markedly decreased allogeneic and autologous transfusions but not hematocrits.

**A-250** Room 310, 10/16/2000 3:30 PM - 5:00 PM (PD)  
**Risk Factors for Stroke after Cardiac Surgery for Women** Charles W. Hogue, Jr., M.D.; Kenneth Schechtman, Ph.D.; Victor G. Davila-Roman, M.D., Anesthesiology, Washington University School of Medicine, St. Louis, MO, United States. A prior neurologic event identifies risk for stroke after cardiac surgery for women, but age, hypertension and duration of bypass are not associated with stroke risk.

**A-251** Room 310, 10/16/2000 3:30 PM - 5:00 PM (PD)  
**Female Gender Is Associated with Lower Cerebral Oxygen Saturation and Worse Outcomes after Cardiac Surgery** Fun-Sun F. Yao, MD; Chia-Chih Tseng, MD; Seth D. Crockett, BA; William C. Boyd, MD; Serle K. Levin, MD, Anesthesiology, Weill Cornell Medical Center, New York, NY, United States. Female gender is associated with lower cerebral rSO<sub>2</sub> and worse outcomes after cardiac surgery.

**A-252** Room 310, 10/16/2000 3:30 PM - 5:00 PM (PD)  
**A New Approach to Reduce Wastage of Fresh Frozen Plasma during Liver Transplant Surgery** David G. Bjoraker, MD; Linda A. Orsini, BS; Belinda S. Manukian, BS; K.J. Kao, MD, PhD, Departments of Anesthesiology and Pathology, University of Florida College of Medicine, Gainesville, FL, United States. Preparation of FFP in the operating room during surgery is effective in reducing FFP wastage and usage.

**Clinical Circulation: Myocardial Ischemia / Infarction**

**A-253** Room 302, 10/18/2000 9:00 AM - 10:30 AM (PD)  
**Detection of Perioperative Ischemia is Improved by Troponin (TnI) Measurement** Shamsuddin Akhtar, M.D.; Lee A. Fleisher, M.D.; Roland Jermyn, B.A.; D.W. Chan, Ph.D.; Stanley H. Rosenbaum, M.D., Department of Anesthesiology, Yale University School of Medicine, New Haven, CT, United States. Troponin I compliments detection of perioperative myocardial injury.

**A-254** Room 302, 10/18/2000 9:00 AM - 10:30 AM (PD)  
**Do Elevated Plasma Cardiac Protein Concentrations Predict Long-Term as Well as Early Outcome in Non-cardiac Surgical Patients?** Helen E. Higham, MB ChB; John W. Sear, PhD; Fiona Neill, MB BS; Yvonne M. Sear, RGN, Nuffield Department of Anaesthetics, Oxford University, Oxford, United Kingdom. Elevated cardiac proteins were predictive of early but not late cardiac complications in eighty surgical patients.

**A-255** Room 302, 10/18/2000 9:00 AM - 10:30 AM (PD)  
**Reduced Postoperative Myocardial Infarction by Prevention of Prolonged Ischemia on 12-lead ECG in Vascular Surgery** Giora Landesberg, M.D., D.Sc.; Misha Perouansky, M.D.; Benjamin Drenger, M.D.; Charles Weissman, M.D., Anesthesiology and C.C.M., Hadassah University Hospital, Jerusalem, Israel. Prevention of prolonged postoperative ischemia on 12-lead ECG monitoring reduces MI following vascular surgery.

**A-256** Room 302, 10/18/2000 9:00 AM - 10:30 AM (PD)  
**Indices of Systemic Oxygenation are Maintained but Myocardial Ischemia Is Common during Profound Hypotension** Diethelm Hansen, M.D.; Rolf Syben, M.D.; Anke Schlosser; Martin Wette, Ass. Prof., Klinik fuer Anaesthesiologie, Klinikum Benjamin Franklin, Berlin, Germany. Oxygen consumption, carbon dioxide production and plasma lactate did not change during induced profound arterial hypotension in humans.

**A-257** Room 302, 10/18/2000 9:00 AM - 10:30 AM (PD)  
**Prophylactic Clonidine Reduces the Incidence of Perioperative Myocardial Ischemia** Arthur W. Wallace, M.D., Ph.D.; Daniel Galindez, M.D.; Beth Layug, M.D.; Denis Boisvert, M.S.; Dennis Mangano, M.D., Ph.D., Anesthesiology, University of California, VAMC, IREF, & McSPI, San Francisco, CA, United States. Clonidine reduced the incidence of perioperative myocardial ischemia (clonidine 23/131 (18%) vs placebo 25/66 (38%) (p = 0.002)).

**A-258** Room 302, 10/18/2000 9:00 AM - 10:30 AM (PD)  
**Perioperative Management of Gene Therapy for Inoperable Coronary Artery Disease: Results of a Phase 1 Clinical Trial** Kishor G. Latbi, M.D.; Peter R. Vale, M.D.; Rafael M. Cespedes, M.D.; James F. Symes, M.D.; Jeffrey M. Isner, M.D., Anesthesiology, St. Elizabeth's Medical Center, Boston, MA, United States. Direct myocardial injection of DNA encoding VEGF used as therapy for intractable angina.
